# Supplementary material
Source: PubMed Central journal article supplement (PMC2648406)
Supplement: NIHMS83212-supplement-supplement_1.pdf [file NIHMS83212-supplement-supplement_1.pdf]

**Supplementary Table 1** Average results from the functional localizer. The t-value of the peak voxel and number of voxels are reported from regions-of-interest localized in native non-standardized space, and all analyses were performed on these regions-of-interest. Mean Talairach coordinates are reported for comparison with other studies only.

| <b>Region-of-Interest</b> | <b># of subjects (/15)</b> | <b>t-value of Peak Voxel</b> | <b># of Voxels (FDR; q&lt;0.05)</b> | <b>X</b>   | <b>Y</b>   | <b>Z</b>    |
|---------------------------|----------------------------|------------------------------|-------------------------------------|------------|------------|-------------|
| Amygdala                  | 5                          | 4.90 $\pm$ 0.63              | 136 $\pm$ 76                        | 17 $\pm$ 1 | -3 $\pm$ 1 | -10 $\pm$ 1 |
| Inferior Frontal Gyrus    | 10                         | 4.79 $\pm$ 0.23              | 238 $\pm$ 102                       | 42 $\pm$ 1 | 15 $\pm$ 2 | 25 $\pm$ 3  |
| Anterior Paracingulate    | 13                         | 5.30 $\pm$ 0.31              | 881 $\pm$ 604                       | 2 $\pm$ 2  | 59 $\pm$ 1 | 2 $\pm$ 2   |
